# Supplementary material for: Multidimensional memory topography in the medial parietal cortex identified from neuroimaging of thousands of daily memory videos
Source: Nat Commun. 2022 Oct 31;13:6508. doi: 10.1038/s41467-022-34075-1 (PMC9622880; doi:10.1038/s41467-022-34075-1)
Supplement: Supplementary file 3 — Source Data [file 41467_2022_34075_MOESM3_ESM.xlsx]

## Sheet: Figure 2
Source Data for: Bainbridge, W.A., & Baker, C.I. (in press). Multidimensional memory topography in the medial parietal cortex identified from neuroimaging of thousands of daily memory videos. Nature Communications.
Figure 2: Emotion & Memory Strength Distributions
Emotion
	S1	S2	S3	S4	S5	S6	S7	S8	S9	S10	S11	S12	S13	S14	S15	S16	S17	S18	S19	S20	S21	S22	S23	S24	S25	S26	S27	S28	S29	S30	S31	S32
very negative	0	3	8	6	2	3	1	0	1	3	1	3	0	1	2	7	8	0	5	10	0	8	7	6	0	0	6	0	0	1	4	0
somewhat negative	0	12	14	8	4	8	8	12	15	5	11	35	5	23	14	22	7	19	12	5	15	7	25	16	0	14	8	14	0	10	22	0
neutral	0	99	61	85	22	101	73	137	67	70	117	41	164	80	102	67	18	37	136	47	97	108	62	85	3	104	59	73	104	76	73	4
somewhat positive	68	123	60	81	88	139	121	82	118	79	87	104	64	143	98	123	50	110	86	113	119	48	72	82	208	93	183	133	147	109	135	4
very positive	228	62	151	77	170	48	89	65	47	113	77	113	66	41	34	67	82	129	19	122	59	128	130	96	36	78	33	70	49	92	61	1
Memory Strength
	S1	S2	S3	S4	S5	S6	S7	S8	S9	S10	S11	S12	S13	S14	S15	S16	S17	S18	S19	S20	S21	S22	S23	S24	S25	S26	S27	S28	S29	S30	S31	S32
very weak	6	85	50	90	7	136	49	100	66	37	103	2	9	11	106	46	9	5	2	105	60	53	13	18	3	75	59	75	170	23	53	1
somewhat weak	20	80	44	70	34	76	37	73	43	40	88	15	53	77	65	59	7	11	78	22	61	35	27	68	46	55	46	41	84	39	65	1
neutral	75	64	32	65	40	43	36	31	43	71	38	43	94	105	54	60	33	17	81	30	56	31	69	103	95	64	68	51	34	45	87	4
somewhat strong	99	25	40	18	74	27	81	30	67	24	14	103	87	69	50	43	32	87	66	31	47	44	84	88	54	38	76	89	8	113	66	2
very strong	96	45	128	17	131	17	95	62	29	98	50	137	57	26	22	79	83	174	31	109	66	136	103	9	49	57	41	34	4	75	24	1

## Sheet: Figure 3
Source Data for: Bainbridge, W.A., & Baker, C.I. (in press). Multidimensional memory topography in the medial parietal cortex identified from neuroimaging of thousands of daily memory videos. Nature Communications.
Figure 3: Regressions between Memory Features
Memory Age & Memory Strength
	S1	S2	S3	S4	S5	S6	S7	S8	S9	S10	S11	S12	S13	S14	S15	S16	S17	S18	S19	S20	S21	S22	S23	S24	S25	S26	S27	S28	S29	S30	S31	S32
slope	-0.00144635	-0.00040369	-0.00290288	-0.00225627	-0.00040023	-0.00030431	-0.00019642	-0.002707	-0.0021109	-0.00035995	-0.001096	-0.00071903	-0.0003123	-0.00292348	-0.00414839	-0.00520459	-0.0028611	-0.00164357	-0.00675346	-0.00239714	-0.00297188	-0.00572043	-0.00157436	0.0006067	-0.00189182	-0.00043187	0.00085693	-0.00319026	-0.00315877	-0.0040609	0.00030964	0.00504597
intercept	4.28	2.639	4.411	2.613	4.367	2.308	3.547	3.843	2.752	4.412	3.648	3.429	2.607	3.926	4.5	3.751	3.902	4.398	4.448	4.213	3.455	4.1	2.009	3.505	4.743	2.875	2.166	3.246	3.374	3.583	2.477	2.426
Memory Age & Emotion
	S1	S2	S3	S4	S5	S6	S7	S8	S9	S10	S11	S12	S13	S14	S15	S16	S17	S18	S19	S20	S21	S22	S23	S24	S25	S26	S27	S28	S29	S30	S31	S32
slope	2.252e-05	-0.00166069	-0.00115936	-0.00067782	-5.868e-05	-6.498e-05	0.00020197	-0.00037455	-0.00033409	-0.00029268	-0.00074153	7.798e-05	-6.816e-05	-0.00119064	-0.00119541	-0.00079978	-0.00063667	-0.00187474	-0.00018225	-0.0015452	-0.00140924	-4.305e-05	0.00067128	0.00111551	-0.00130775	-0.00117678	0.00041379	-0.00020537	-0.00051651	-0.00117491	0.00013742	-0.00170679
intercept	4.764	4.14	4.486	3.949	4.521	3.796	3.896	4.151	3.836	4.154	3.785	3.656	3.64	4.08	4.286	3.483	3.968	4.673	4.162	4.344	4.018	4.126	3.659	3.795	4.415	3.957	3.458	3.815	3.973	4.035	3.622	3.898
Distance & Memory Strength
	S1	S2	S3	S4	S5	S6	S7	S8	S9	S10	S11	S12	S13	S14	S15	S16	S17	S18	S19	S20	S21	S22	S23	S24	S25	S26	S27	S28	S29	S30	S31	S32
slope	0.00076824	0.00100244	0.00013515	0.00019088	9.494e-05	0.00016555	0.00051906	0.00010951	0.00336128	0.00023957	0.00032231	0.00023169	0.0002892	-0.0001599	0.00019831	9.08e-05	0.00656264	5.614e-05	0.00016501	0.00010805	0.0006594	0.00031506	6.812e-05	0.00048101	3.124e-05	-8.305e-05	5.196e-05	0.00082831	0.00055597	0.00058123	0.00010726	0.00047206
intercept	3.834	2.421	3.344	2.166	3.827	2.01	3.477	3.289	2.312	4.052	3.405	3.034	2.284	3.207	4.018	2.95	2.792	3.787	3.385	3.549	2.892	2.975	1.634	3.556	4.308	2.897	2.854	2.64	2.812	2.859	2.555	2.872
Distance & Emotion
	S1	S2	S3	S4	S5	S6	S7	S8	S9	S10	S11	S12	S13	S14	S15	S16	S17	S18	S19	S20	S21	S22	S23	S24	S25	S26	S27	S28	S29	S30	S31	S32
slope	2.805e-05	0.00048827	6.902e-05	0.00015641	2.57e-05	8.981e-05	0.00035019	4.374e-05	0.00317417	0.00013385	0.00030197	0.00017916	0.00017392	5.85e-05	3.57e-05	1.218e-05	0.00440357	5.409e-05	0.0001268	8.358e-05	0.00032951	0.00016409	0.00018643	0.00033542	2.015e-05	0.00073388	3.961e-05	0.00063534	0.00028946	0.00047839	-3.911e-05	0.00033306
intercept	4.769	3.716	4.041	3.776	4.42	3.734	4.002	4.102	3.662	3.901	3.582	3.594	3.501	3.776	4.152	3.365	3.631	3.95	4.105	3.903	3.75	4.07	3.78	3.945	4.117	3.605	3.749	3.687	3.854	3.805	3.703	3.498

## Sheet: Figure 5a
Source Data for: Bainbridge, W.A., & Baker, C.I. (in press). Multidimensional memory topography in the medial parietal cortex identified from neuroimaging of thousands of daily memory videos. Nature Communications.
Figure 5a: Combined Model Betas (Hippocampus)
	S1	S2	S3	S4	S5	S6	S7	S8	S9	S10	S11	S12	S13	S14	S15	S16	S17	S18	S19	S20	S21	S22	S23	S24	S25	S26	S27	S28	S29	S30	S31	S32
memory strength	12.7695	3.4621	7.4746	9.3097	1.9255	6.6491	-0.7745	-0.7634	-0.1141	6.2141	2.581	14.2219	-1.2946	0.467	-13.1338	2.2585	2.195	13.2703	10.3503	10.1469	-2.0944	16.4675	5.5859	3.0148	6.3575	4.3084	16.7069	5.2963	3.3809	2.0032	2.1685	-0.1807
emotion	-12.0774	8.5595	9.629	3.1053	-11.2229	1.3529	10.0959	2.7606	0.4264	3.8571	4.2357	7.2197	-7.9651	1.9746	0.6894	2.6709	4.767	6.3394	4.8157	4.8195	23.0649	17.1333	-2.986	2.3698	13.5426	3.8852	7.9173	0.8673	0.3785	17.8212	-8.3393	0.8311
memory age	0.0348	-0.0357	0.0051	0.0612	0.0051	0.0039	-0.0007	-0.0022	0.0534	-0.1195	0.042	-0.0039	-0.0175	0.02	0.0017	-0.021	-0.0569	-0.0183	-0.0673	0.0306	0.0193	0.0162	0.0101	-0.0064	0.0882	-0.0795	0.0207	0.0497	-0.0257	-0.1395	-0.1096	-0.0031
distance	0.038	-0.0158	0.0052	0.0012	0.0013	-0.0073	-0.0007	0.0003	-0.0076	0.0014	0.0086	0.0045	0.0047	-0.0014	0.0006	0.0024	0.0045	-0.0009	-0.0039	-0.0036	-0.1234	-0.0004	0.0013	0.0002	-0.0034	0.0093	0.0007	0.0133	-0.007	0.0081	-0.0159	0.0008

## Sheet: Figure 5b
Source Data for: Bainbridge, W.A., & Baker, C.I. (in press). Multidimensional memory topography in the medial parietal cortex identified from neuroimaging of thousands of daily memory videos. Nature Communications.
Figure 5b: DNN and Optical Flow Predictions
(All correlation coefficients)	S1	S2	S3	S4	S5	S6	S7	S8	S9	S10	S11	S12	S13	S14	S15	S16	S17	S18	S19	S20	S21	S22	S23	S24	S25	S26	S27	S28	S29	S30	S31	S32
DNN early layer memory strength predictions	0.0031	0.3239	0.0841	0.0408	0.0238	0.0559	0.1333	0.0995	0.069	-0.1115	-0.083	0.0515	0.0409	0.0247	-0.0303	0.1878	0.135	0.1806	0.0667	-0.019	0.0992	0.0182	NaN	0.0592	-0.03	0.1381	0.0784	0.1975	0.0584	-0.0387	-0.0926	-0.055
DNN late layer memory strength predictions	0.2294	0.4573	0.3464	0.2251	-0.0044	-0.0105	0.2571	0.4104	0.3234	0.091	0.1549	0.1693	0.372	0.1673	0.1164	0.2196	0.0852	0.1411	0.1922	0.2382	0.3422	0.4451	NaN	0.1555	0.2914	0.1695	0.3032	0.4305	0.3194	0.2871	0.3181	NaN
DNN early layer emotion predictions	0.0803	0.1079	0.0767	0.0538	0.0636	-0.1058	0.0089	0.0688	0.1415	0.0446	-0.0298	-0.065	0.1798	-0.0118	0.0004	0.0371	0.0476	0.0549	0.1464	0.0231	0.0063	-0.0285	NaN	0.0686	0.1219	0.0334	-0.0005	0.1996	-0.0201	-0.0665	0.0502	NaN
DNN late layer emotion predictions	0.1644	0.2532	0.1568	0.2343	0.0004	0.1262	0.0609	0.32	0.2192	0.1191	0.1136	0.21	0.4104	0.0285	0.1635	0.1514	0.1876	0.0766	0.2001	0.1459	0.2606	0.2188	NaN	0.1722	0.1572	0.0445	0.0818	0.3197	0.0701	0.0786	0.1506	NaN
Optical flow memory strength predictions	-0.0288	-0.0152	0.1921	0.0236	-0.0938	-0.1091	0.0595	0.1227	0.0471	0.056	-0.0082	-0.0108	0.173	-0.0678	-0.0413	0.0577	0.0376	-0.0165	0.1928	-0.0684	-0.0837	0.1152	NaN	0.0929	-0.0828	-0.0429	0.0635	0.1278	-0.0989	0.021	-0.0338	0.0384
Optical flow emotion predictions	-0.0043	0.1035	0.1603	0.0421	-0.032	-0.0726	0.0165	0.158	0.0824	0.0714	0.0158	0.0617	0.1606	-0.0615	-0.0334	0.0717	0.1196	-0.0246	0.1262	0.0178	-0.0146	0.1448	NaN	0.0291	0.0011	-0.0229	0.091	0.106	0.0139	0.03	-0.071	0.0367

## Sheet: Figure 8
Source Data for: Bainbridge, W.A., & Baker, C.I. (in press). Multidimensional memory topography in the medial parietal cortex identified from neuroimaging of thousands of daily memory videos. Nature Communications.
Figure 8: Leave-one-out Analysis of Medial Parietal Subregions
	S1	S2	S3	S4	S5	S6	S7	S8	S9	S10	S11	S12	S13	S14	S15	S16	S17	S18	S19	S20	S21	S22	S23	S24	S25	S26	S27	S28	S29	S30	S31	S32
age region: age selectivity	2.0193	0.8562	1.4877	2.2163	-0.2814	1.0069	1.3416	-0.0982	0.3444	0.3892	1.253	0.1325	0.2709	-1.2067	0.6124	-0.6608	0.0733	1.5473	2.0614	1.6533	1.0513	1.8226	0.42	-0.2808	1.0961	0.0551	0.3872	NaN	1.5133	2.1146	0.0051	NaN
age region: people selectivity	NaN	1.0596	0.8643	1.0666	-0.871	0.9648	0.092	-0.1925	1.1233	-0.2474	-0.7556	0.0881	-0.2969	0.2747	0.8157	-0.663	NaN	-0.248	NaN	0.3048	-1.5456	-0.6804	-0.5492	0.7329	-0.5039	0.3186	-1.1611	-1.0531	0.2644	-0.1973	-0.8824	-0.1236
age region: place selectivity	0.1499	-0.0827	-0.2588	-0.338	-1.0114	-1.6089	-1.4461	-0.34	-0.3974	0.4647	-0.0113	-0.0203	-0.1313	0.6312	-1.0318	-0.9989	0.3364	0.2619	-0.7471	-0.377	-0.1905	0.9044	0.2768	1.2311	-0.0437	0.3872	-1.2517	0.603	-0.1603	-1.6435	0.2234	-0.0689
age region: memory strength selectivity	0.1096	-1.4328	0.0011	-1.6073	-0.7196	0.1657	-1.1819	-0.4104	-0.4492	0.3867	-0.0534	0.1803	-0.1246	0.0364	-0.2567	0.5992	-0.4602	0.1377	2.0128	-0.5474	0.3653	-1.2384	-0.1781	0.0868	-0.5599	-1.4223	-1.2318	-0.8863	0.7505	-1.0855	-0.0272	NaN
people region: age selectivity	0.0692	0.758	-0.1315	-0.1871	0.1273	-0.4578	0.0875	-0.0797	-0.0921	0.0364	0.3862	-0.0338	-0.3502	-0.2298	0.0577	-0.1954	0.463	-0.0152	-0.0781	-0.3485	0.2413	0.1268	0.3172	-0.1469	0.6124	-0.4304	0.0494	NaN	-0.319	0.0144	0.067	NaN
people region: people selectivity	NaN	-0.5328	-0.095	0.3495	0.2838	0.0618	0.2254	0.7274	0.4385	-0.3893	0.6796	-0.007	0.532	0.5442	-0.3506	-0.1983	NaN	0.3678	NaN	0.5304	0.2489	0.1765	0.1347	0.1427	0.3807	0.2893	0.7358	0.2072	-0.1115	0.3877	-0.0544	-0.2332
people region: place selectivity	0.4189	0.5061	-0.1637	-0.2679	0.1192	0.3339	0.2277	-0.1783	0.2927	0.4185	-0.2571	0.1615	0.0744	-0.4227	0.3583	0.022	0.1422	0.6075	-0.0211	-0.3269	0.1803	0.4735	-0.0382	0.1416	0.2837	0.1379	0.2932	-0.1296	-0.0203	0.5629	-0.1542	-0.4097
people region: memory strength selectivity	0.3757	0.7211	0.3741	0.4772	0.904	0.711	0.0843	0.0493	0.2856	0.3836	0.9673	0.0877	0.1473	0.1614	0.3255	0.5554	0.1941	0.7565	0.1121	0.123	0.2335	0.5546	0.2381	-0.0469	0.6752	0.4499	0.8354	0.303	0.1339	1.0084	0.3418	NaN
place region: age selectivity	-0.6822	0.7038	-0.2647	0.2498	-0.2201	-0.8301	0.0453	-0.0336	0.7705	0.0471	0.7032	0.103	-0.1475	-0.4748	-0.6559	-0.8616	0.311	-0.1917	0.1852	0.138	-0.0953	0.3252	-0.0143	-0.1893	0.0323	-0.1316	0.2606	NaN	0.1417	0.2694	0.0773	NaN
place region: people selectivity	NaN	-0.3788	-0.3285	0.052	-0.1425	-0.1285	-0.1888	-0.0155	-0.5852	-0.1508	-0.1326	0.0717	-0.3274	0.1645	-0.3492	-0.1011	NaN	-0.4168	NaN	1.0009	-0.1362	0.627	0.5251	-0.0405	-0.7323	-0.4654	0.2498	0.9271	0.029	0.4005	-0.3407	-0.2712
place region: place selectivity	0.9437	0.2043	0.0686	-0.7842	0.0095	-0.1596	1.3416	0.1192	0.4397	0.4635	1.142	0.0023	0.1242	1.1908	0.3116	0.1028	0.0733	1.2981	0.2038	0.0073	-0.187	0.8763	0.0397	0.2362	0.7944	0.3358	0.7666	0.2921	0.2842	0.4082	0.3403	0.4165
place region: memory strength selectivity	0.0871	0.1625	0.4758	0.9087	0.4211	0.7507	1.133	-0.0326	0.1227	0.078	0.4135	0.1322	0.4306	0.3259	0.6455	0.6369	1.2027	0.8842	-0.0072	-0.2664	0.3387	0.5767	-0.0758	-0.2476	-0.1787	0.0705	0.8064	-0.0769	0.8078	0.4038	0.7352	NaN
memory strength region: age selectivity	0.253	0.5683	-1.0056	-0.0367	0.12	-0.842	0.1871	-0.3441	0.006	-0.4464	0.8867	0.1454	0.1477	-0.9451	-0.1337	-0.4515	0.5549	-0.4185	0.5824	-0.4599	0.6775	-0.0993	-0.2281	0.0322	0.6299	-0.8343	-0.3604	NaN	-0.0311	0.0533	0.2785	NaN
memory strength region: people selectivity	NaN	-0.7457	0.2013	0.7617	0.0414	-0.2558	0.0698	0.9403	0.9005	-0.6227	0.5472	0.1945	0.9187	1.3869	-0.6274	0.0578	NaN	0.1613	NaN	1.0691	-0.3121	1.2079	0.3428	0.1192	-0.0566	0.115	0.3998	0.8672	0.2286	0.0503	0.3975	-0.2542
memory strength region: place selectivity	1.3196	0.9885	0.7406	-0.8095	-0.5251	0.8824	0.3164	-0.1654	0.6679	0.306	0.2408	0.0599	0.1844	-0.4853	0.9342	-0.2138	-0.5214	1.8601	0.2572	-0.9171	0.3095	0.8264	-0.2138	0.5225	0.3104	0.7123	1.3197	-0.204	0.2334	1.1354	-0.5787	-0.0978
memory strength region: memory strength selectivity	1.1359	1.5897	1.6981	0.758	1.3968	1.5449	0.2487	0.9437	0.1847	0.7876	1.5907	0.6328	0.8948	0.841	0.6318	1.5548	0.0309	2.5425	0.504	0.2941	0.7608	1.2284	0.3458	0.6361	0.7633	0.6422	1.2403	-0.1279	0.5976	1.9282	0.1178	NaN

## Sheet: Suppl Figure 1
Source Data for: Bainbridge, W.A., & Baker, C.I. (in press). Multidimensional memory topography in the medial parietal cortex identified from neuroimaging of thousands of daily memory videos. Nature Communications.
Supplemental Figure 1a: Distribution of participants' video locations
(all are proportions of total videos)	S1	S2	S3	S4	S5	S6	S7	S8	S9	S10	S11	S12	S13	S14	S15	S16	S17	S18	S19	S20	S21	S22	S23	S24	S25	S26	S27	S28	S29	S30	S31	S32
unique location	0.247	0.121	0.071	0.327	0.322	0.163	0.362	0.384	0.517	0.294	0.275	0.576	0.099	0.474	0.55	0.292	0.415	0.585	0.38	0.249	0.355	0.102	0.484	0.489	0.402	0.392	0.26	0.574	0.139	0.294	0.304	0.778
most common location	0.645	0.805	0.391	0.315	0.336	0.457	0.136	0.107	0.128	0.254	0.282	0.098	0.466	0.09	0.138	0.201	0.183	0.08	0.178	0.35	0.307	0.485	0.216	0.042	0.155	0.135	0.536	0.106	0.665	0.27	0.251	0.333
user (selfie)	0.033	0.05	0.014	0.142	0.004	0.005	0.04	0.005	0.024	0.184	0.024	0.009	0.185	0.062	0.032	0.006	0.103	0.007	0.004	0.003	0.228	0.081	0.172	0.053	0.061	0.047	0.066	0.035	0.001	0.036	0.29	0.005
familiar person	0.537	0.774	0.318	0.371	0.071	0.185	0.096	0.219	0.469	0.511	0.443	0.117	0.105	0.16	0.127	0.323	0.331	0.116	0.291	0.047	0.062	0.158	0.265	0.182	0.677	0.251	0.235	0.219	0.171	0.108	0.318	0.002
new person	0	0	0.027	0.0112	0.0064	0.0007	0.0364	0.0038	0.0276	0.0106	0.0581	0.0017	0.0027	0.0412	0.017	0.032	0.1029	0.0056	0.0216	0.0027	0.0029	0.0086	0.0721	0.0301	0.0875	0.0047	0.0017	0.0174	0	0.0276	0.0096	0.0016
